# Supplementary figures and images for: Biochemical and Genetic Association of Plasma Vitamin D Levels and Vitamin D Receptor Gene Polymorphisms with Primary Sjögren’s Syndrome in the Tunisian Population
Source: Research Square preprint supplement (doi:10.21203/rs.3.rs-7309740/v1), 2025-09-11

**Graphical abstract**

**
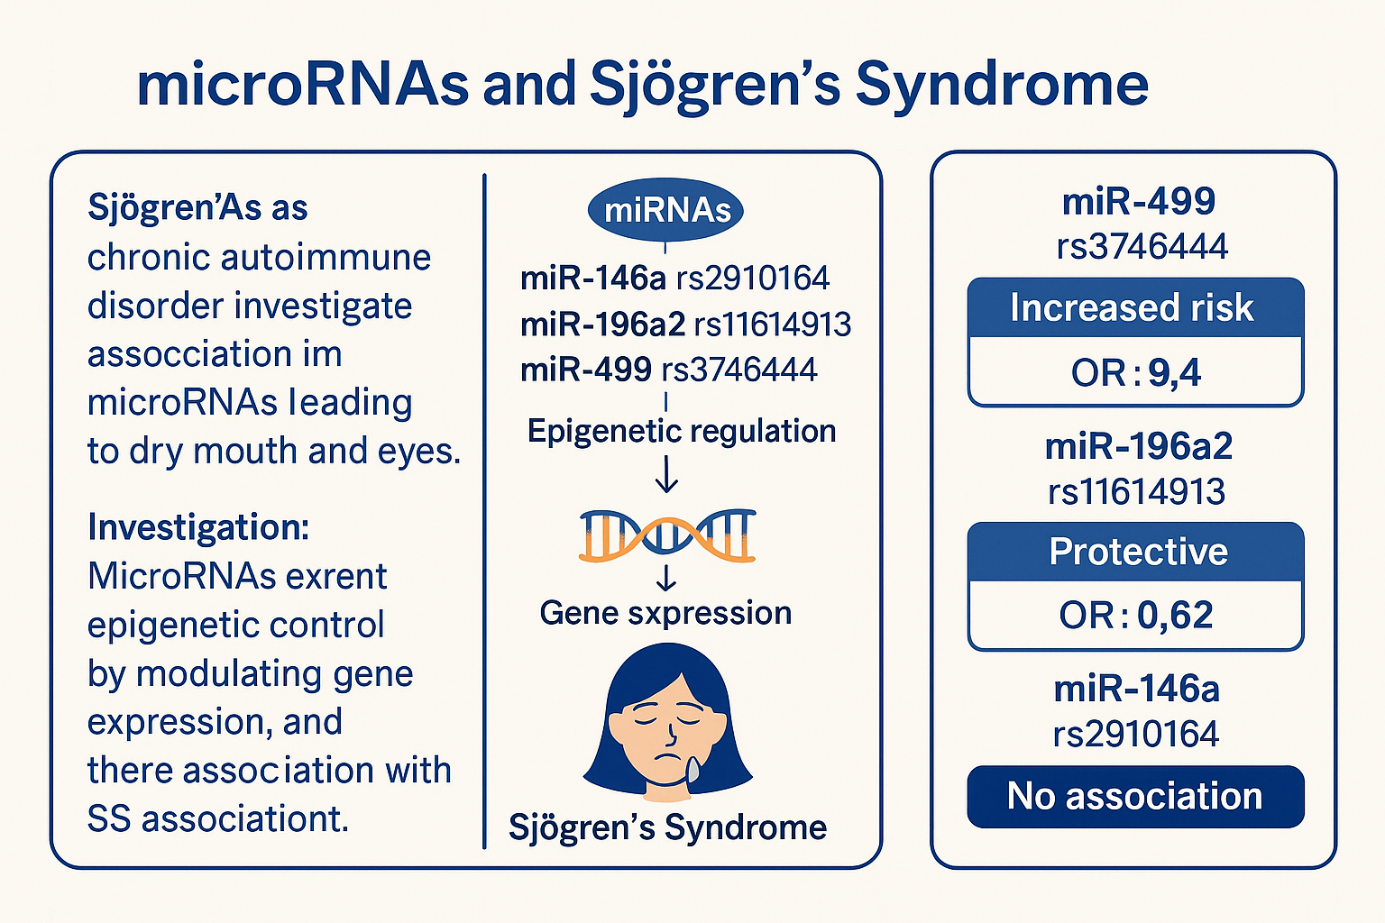
**

Supplement: Supplementary file 1 [file a7f62af72498a1e8996f5bbb.docx]
